# Supplementary material
Source: ML conference proceedings conference paper supplement (https://openaccess.thecvf.com/content/CVPR2022/html/Zhang_FMCNet_Feature-Level_Modality_CVPR_2022_paper.html)
Supplement: Supplementary file 1 [file Zhang_FMCNet_Feature-Level_Modality_CVPR_2022_supplemental.pdf]

# FMCNet: Feature-Level Modality Compensation for Visible-Infrared Person Re-Identification

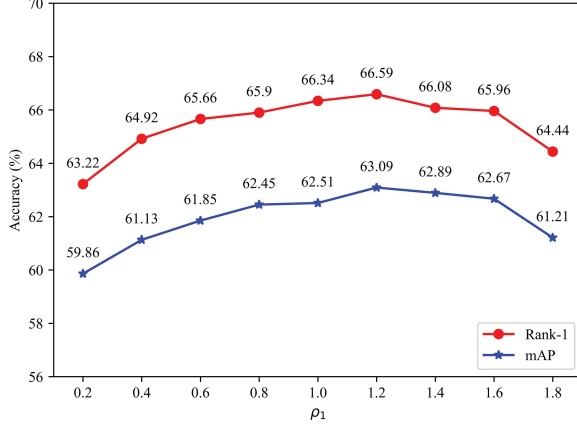

Figure 1. Evaluation results of parameter  $\rho_1$  with different values.

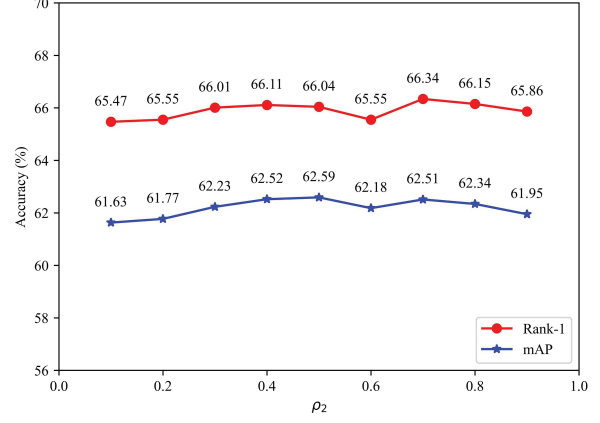

Figure 2. Evaluation results of parameter  $\rho_2$  with different values.

## 1. Impacts of the Hyper-parameters

In this section, we will analyze the impacts of all the hyper-parameters in different loss functions on SYSU-MM01 dataset, including  $\rho_1$  in Eq. (4),  $\rho_2$  in Eq. (5),  $\rho_3$  in Eq. (6),  $\lambda_1$  and  $\lambda_2$  in Eq. (7), and  $\rho_4$  and  $\beta$  in Eq. (17).

### 1.1. Evaluation of different values of parameter $\rho_1$ in Eq. (4)

We first set  $\rho_2 = \rho_3 = \rho_4 = 0.7$ ,  $\beta = 2$  and  $\lambda_1 = \lambda_2 = 0.5$ , and then change  $\rho_1$  from 0.2 to 1.8 with the interval of 0.2. As shown in Fig. 1, the accuracies are improved with the increase of  $\rho_1$  at the first, and achieve the best when  $\rho_1 = 1.2$ . Therefore, we set  $\rho_1 = 1.2$ .

### 1.2. Evaluation of different values of parameter $\rho_2$ in Eq. (5)

We first set  $\rho_1 = 1$ ,  $\rho_3 = \rho_4 = 0.7$ ,  $\beta = 2$  and  $\lambda_1 = \lambda_2 = 0.5$ , and then change  $\rho_2$  from 0.1 to 0.9 with an interval of 0.1. As shown in Fig. 2, when  $\rho_2 = 0.7$ , our proposed model obtains the best performance. Therefore, we set  $\rho_2 = 0.7$  in this paper.

### 1.3. Evaluation of different values of parameter $\rho_3$ in Eq. (6)

We first set  $\rho_1 = 1$ ,  $\rho_2 = \rho_4 = 0.7$ ,  $\beta = 2$  and  $\lambda_1 = \lambda_2 = 0.5$ , and then change  $\rho_3$  from 0.1 to 0.9 with an interval of 0.1. Fig. 3 reveals that our proposed model obtains the best performance. Therefore, we set  $\rho_3 = 0.7$  in this paper.

### 1.4. Evaluation of different values of parameters $\lambda_1$ and $\lambda_2$ in Eq. (7)

We first set  $\rho_1 = 1$ ,  $\rho_2 = \rho_3 = \rho_4 = 0.7$ ,  $\beta = 2$  and  $\lambda_2 = 0.5$  ( $\lambda_1 = 0.5$ ), and then change  $\lambda_1$  ( $\lambda_2$ ) from 0.1 to 0.9 with an interval of 0.1. As shown in Fig. 4, the performance of our proposed model reaches a peak when  $\lambda_1 = 0.5$ . Similarly, Fig. 5 reveals that our model obtains the best performance when  $\lambda_2 = 0.5$ . Therefore, we set  $\lambda_1 = \lambda_2 = 0.5$  in this paper.

### 1.5. Evaluating different values of parameters $\rho_4$ and $\beta$ in Eq. (17)

When evaluating  $\rho_4$ , we first set  $\rho_1 = 1$ ,  $\rho_2 = \rho_3 = 0.7$ ,  $\beta = 2$  and  $\lambda_1 = \lambda_2 = 0.5$ , and then change  $\rho_4$  from 0.1 to 0.9 with an interval of 0.1. Fig. 6 shows that our model performs the best when  $\rho_4 = 0.7$ . Therefore, we set  $\rho_4 =$

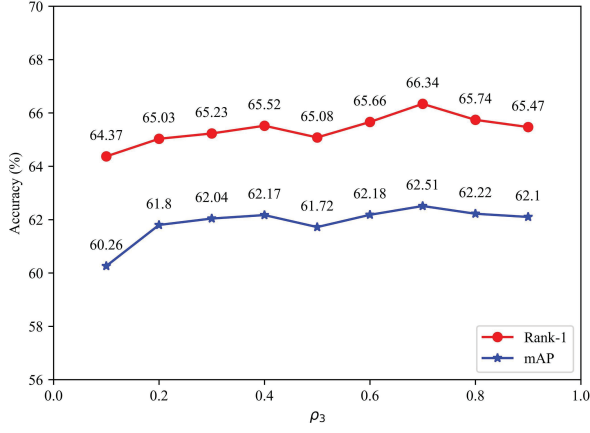

Figure 3. Evaluation results of parameter  $\rho_3$  with different values.

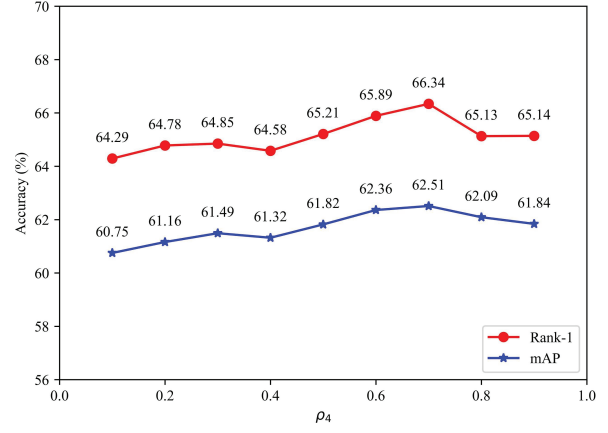

Figure 6. Evaluation results of parameter  $\rho_4$  with different values.

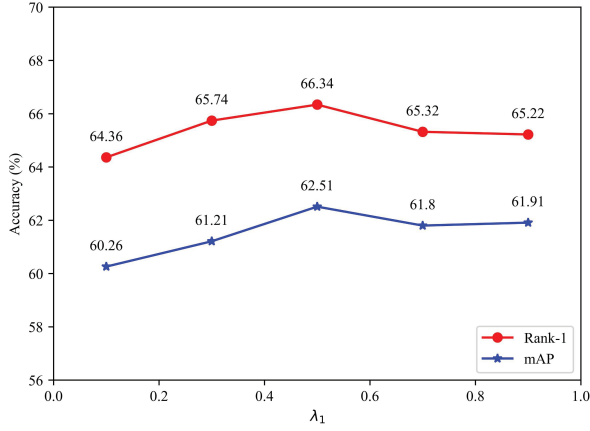

Figure 4. Evaluation results of parameter  $\lambda_1$  with different values.

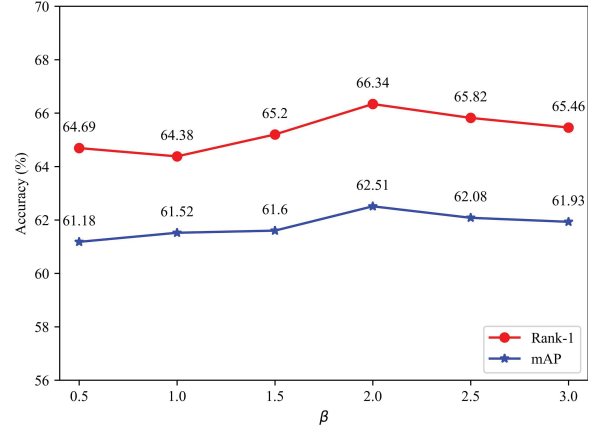

Figure 7. Evaluation results of parameter  $\beta$  with different values.

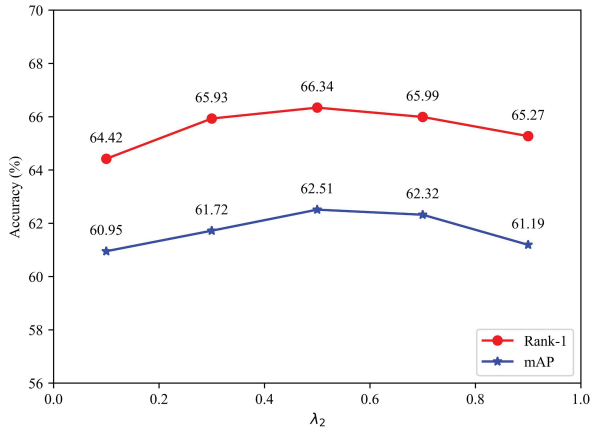

Figure 5. Evaluation results of parameter  $\lambda_2$  with different values.

| Setting         | Rank-1 | mAP   |
|-----------------|--------|-------|
| Base            | 57.09  | 53.11 |
| Base+ $L_{shs}$ | 61.93  | 56.84 |
| Base+SFD+FMC    | 65.50  | 62.32 |

Table 1. Effectiveness of the  $L_{shs}$ .

0.7 in this paper.

When evaluating  $\beta$ , we first set  $\rho_1 = 1, \rho_2 = \rho_3 = \rho_4 = 0.7$  and  $\lambda_1 = \lambda_2 = 0.5$ , and then change  $\beta$  from 0.5 to 3 with the interval of 0.5. As shown in Fig. 7, our model achieves the best performance when  $\beta = 2$ . Therefore, we set  $\beta = 2$  in this paper.

## **2. Effectiveness of the modality-shared feature separation loss and cross-modal feature compensation**

As shown in Table 1, the modality-shared feature separation loss  $L_{shs}$  can effectively reduce the modality discrepancy between the modality-shared visible and infrared features, which significantly improve the performance. Moreover, after compensating cross-modal feature by FMC module, our model further boosts the performance of VI-ReID by jointly using specific-shared features.
